# Supplementary material for: Effects of training adaption in endurance athletes with atrial fibrillation: protocol for a multicentre randomised controlled trial
Source: HighWire-hosted journal article supplement (doi:10.1136/bmjsem-2023-001541), 2023-04-01
Supplement: bmjsem-2023-001541supp002_data_supplement.pdf [file bmjsem-2023-001541supp002_data_supplement.pdf]

**Supplementary table 2. World Health Organization Trial Registration Data Set (Version 1.3.1)**

| Item Nr. | Description                                                                                                                                                                                                                                                                                                                                                                                                                                                                                                                                                                                                                |
|----------|----------------------------------------------------------------------------------------------------------------------------------------------------------------------------------------------------------------------------------------------------------------------------------------------------------------------------------------------------------------------------------------------------------------------------------------------------------------------------------------------------------------------------------------------------------------------------------------------------------------------------|
| 1.       | <b>Primary Registry and Trial Identifying Number</b><br>ClinicalTrials.gov Identifier NCT04991337                                                                                                                                                                                                                                                                                                                                                                                                                                                                                                                          |
| 2.       | <b>Date of Registration in Primary Registry</b><br>5 August 2021                                                                                                                                                                                                                                                                                                                                                                                                                                                                                                                                                           |
| 3.       | <b>Secondary Identifying Numbers</b><br>Vestre Viken Hospital Trust Data Protection Officer reference 21/05277-1                                                                                                                                                                                                                                                                                                                                                                                                                                                                                                           |
| 4.       | <b>Source(s) of Monetary or Material Support</b><br>The study is funded by The Norwegian Health Association and Vestre Viken Hospital Trust, Norway.                                                                                                                                                                                                                                                                                                                                                                                                                                                                       |
| 5.       | <b>Primary Sponsor</b><br>Bærum sykehus, Vestre Viken Hospital Trust                                                                                                                                                                                                                                                                                                                                                                                                                                                                                                                                                       |
| 6.       | <b>Secondary Sponsor(s)</b><br>N/A                                                                                                                                                                                                                                                                                                                                                                                                                                                                                                                                                                                         |
| 7.       | <b>Contact for Public Queries</b><br><br>Norway:<br>Marius Myrstad, MD, PhD<br>Address: Department of Internal Medicine, and Department of Medical Research, Bærum Hospital Vestre Viken Hospital Trust, Sogneprest Munthe Kaas vei 100, N-1346 Gjøttum, Norway<br>E-mail address: Marius.Myrstad@vestreviken.no<br>Phone number: +47-92255945<br><br>Belgium:<br>Guido Claessen, MD, PhD<br>Address: Department of Cardiovascular Diseases, UZ Leuven, Herestraat 49, B-3000 Leuven, Belgium<br>E-mail address: guido.claessen@uzleuven.be<br>Phone number: +32 16 34 20 09<br><br>Australia:<br>André La Gerche, MD, PhD |

|            |                                                                                                                                                                                                                                                                                                                                                                                                                                                                                                                                                                                                                                           |
|------------|-------------------------------------------------------------------------------------------------------------------------------------------------------------------------------------------------------------------------------------------------------------------------------------------------------------------------------------------------------------------------------------------------------------------------------------------------------------------------------------------------------------------------------------------------------------------------------------------------------------------------------------------|
|            | <p>Address: Baker Heart and Diabetes Institute, 75 Commercial Road, Melbourne VIC 3004, Australia<br/> E-mail address: Andre.LaGerche@baker.edu.au<br/> Phone number: +61 481 300 929</p>                                                                                                                                                                                                                                                                                                                                                                                                                                                 |
| <b>8.</b>  | <p><b>Contact for Scientific Queries</b></p> <p>Primary investigator<br/> Marius Myrstad, MD, PhD<br/> Address: Department of Internal Medicine, and Department of Medical Research, Bærum Hospital Vestre Viken Hospital Trust, Sogneprest Munthe Kaas vei 100, N-1346 Gjøttum, Norway<br/> E-mail address: Marius.Myrstad@vestreviken.no<br/> Phone number: +47-92255945</p>                                                                                                                                                                                                                                                            |
| <b>9.</b>  | <p><b>Public Title</b></p> <p>Effects of Detraining in Endurance Athletes with Atrial Fibrillation (The NEXAF Detraining study). An international multicentre randomized controlled trial</p>                                                                                                                                                                                                                                                                                                                                                                                                                                             |
| <b>10.</b> | <p><b>Scientific Title</b></p> <p>Effects of Detraining in Endurance Athletes with Atrial Fibrillation (The NEXAF Detraining study). An international multicentre randomized controlled trial</p>                                                                                                                                                                                                                                                                                                                                                                                                                                         |
| <b>11.</b> | <p><b>Countries of Recruitment</b></p> <p>Australia, Belgium, Norway</p>                                                                                                                                                                                                                                                                                                                                                                                                                                                                                                                                                                  |
| <b>12.</b> | <p><b>Health conditions studied</b></p> <p>Atrial fibrillation</p>                                                                                                                                                                                                                                                                                                                                                                                                                                                                                                                                                                        |
| <b>13.</b> | <p><b>Intervention (s)</b></p> <p>Detraining (tailored training adaption) group:<br/> Will be instructed to avoid high-intensity exercise corresponding to a heart rate &gt;75% of maximum heart rate (HR), and a total duration of exercise (hours/week) corresponding to &gt;80% of the self-reported average weekly amount of exercise (hours/week) during the past six months, for a period of 16 week.</p> <p>Control group:<br/> Will be instructed to perform at least three weekly sessions of high intensity exercise, corresponding to a HR ≥85% of maximum heart rate, and otherwise continue endurance exercise as usual.</p> |
| <b>14.</b> | <p><b>Key Inclusion and Exclusion Criteria</b></p> <p>Inclusion Criteria:<br/> Signed informed consent<br/> Age ≥ 18 years<br/> Diagnosed with paroxysmal atrial fibrillation (verified by electrocardiogram)<br/> Report &gt;5 (running, rowing) or &gt;8 (cycling, cross-country skiing), weekly hours, respectively, of endurance sport</p>                                                                                                                                                                                                                                                                                            |

|            |                                                                                                                                                                                                                                                                                                                                                                                                                                                                                                                                                                                                                                                                                                                                                                                                                                                                                                                                                                                                                                                                                                              |
|------------|--------------------------------------------------------------------------------------------------------------------------------------------------------------------------------------------------------------------------------------------------------------------------------------------------------------------------------------------------------------------------------------------------------------------------------------------------------------------------------------------------------------------------------------------------------------------------------------------------------------------------------------------------------------------------------------------------------------------------------------------------------------------------------------------------------------------------------------------------------------------------------------------------------------------------------------------------------------------------------------------------------------------------------------------------------------------------------------------------------------|
|            | <p>At least two anamnestic (self-reported) episodes of atrial fibrillation, of which one during the last six months</p> <p>Use a smartphone and agree to connect their sportswatch with a web-based platform for monitoring of exercise</p> <p>Exclusion Criteria:</p> <p>Permanent atrial fibrillation</p> <p>Cardiac conditions (including valvular heart disease of moderate or greater severity, symptomatic ischemic heart disease)</p> <p>Left ventricular ejection fraction &lt;45%</p> <p>Hypertension (&gt;140/90)</p> <p>Diabetes mellitus</p> <p>Hyperthyroidism</p> <p>Smoking during the last 5 years</p> <p>Alcohol intake &gt;20 alcohol units/week</p> <p>Use of illegal or performance enhancing drugs</p> <p>Body mass index &gt;30kg/m<sup>2</sup></p> <p>Injuries preventing physical exercise</p> <p>Pregnancy</p> <p>Participation in conflicting intervention research studies</p> <p>Planned atrial fibrillation ablation within the next six months</p> <p>The individual refuses to have an insertable cardiac monitor, blood samples taken or be part of the detraining group</p> |
| <b>15.</b> | <p><b>Study type</b></p> <p>Randomized controlled trial</p>                                                                                                                                                                                                                                                                                                                                                                                                                                                                                                                                                                                                                                                                                                                                                                                                                                                                                                                                                                                                                                                  |
| <b>16.</b> | <p><b>Date of First Enrollment</b></p> <p>5 Januar 2022</p>                                                                                                                                                                                                                                                                                                                                                                                                                                                                                                                                                                                                                                                                                                                                                                                                                                                                                                                                                                                                                                                  |
| <b>17.</b> | <p><b>Sample size</b></p> <p>120</p>                                                                                                                                                                                                                                                                                                                                                                                                                                                                                                                                                                                                                                                                                                                                                                                                                                                                                                                                                                                                                                                                         |
| <b>18.</b> | <p><b>Recruitment status</b></p> <p>Recruiting: participants are currently being recruited and enrolled</p>                                                                                                                                                                                                                                                                                                                                                                                                                                                                                                                                                                                                                                                                                                                                                                                                                                                                                                                                                                                                  |
| <b>19.</b> | <p><b>19. Primary Outcome(s)</b></p> <p>Outcome Name: Atrial fibrillation burden</p> <p>Metric/method of measurement: Atrial fibrillation burden (time with atrial fibrillation) as measured by continuous monitoring with insertable cardiac monitor and calculated as the cumulative duration of all atrial fibrillation episodes lasting ≥30sec divided by total duration of monitoring and reported as percentages.</p> <p>Timepoint: Measured during the last 4 weeks (week 13-16) of the 16-week intervention period</p>                                                                                                                                                                                                                                                                                                                                                                                                                                                                                                                                                                               |
| <b>20.</b> | <p><b>20. Key Secondary Outcomes</b></p> <p>Outcome Name: Atrial fibrillation burden</p>                                                                                                                                                                                                                                                                                                                                                                                                                                                                                                                                                                                                                                                                                                                                                                                                                                                                                                                                                                                                                     |

|                                                                                                                                                                                                                                                                                                                                                                                                                                                                                                                                                                                                                                                                                                                                                                                                                                                                                                                                                                                                                                                                                                                                                                                                                                                                                                                                                                                                                                                                                                                                                                                                                                                                                                                                                                                                                                                                                                                                                                                                                                                                                                                                                                                                                                                                                                                                                                                                                                                                                                                                                                                                                                                                                                                                                                                                                                                                                                                                                                                                 |
|-------------------------------------------------------------------------------------------------------------------------------------------------------------------------------------------------------------------------------------------------------------------------------------------------------------------------------------------------------------------------------------------------------------------------------------------------------------------------------------------------------------------------------------------------------------------------------------------------------------------------------------------------------------------------------------------------------------------------------------------------------------------------------------------------------------------------------------------------------------------------------------------------------------------------------------------------------------------------------------------------------------------------------------------------------------------------------------------------------------------------------------------------------------------------------------------------------------------------------------------------------------------------------------------------------------------------------------------------------------------------------------------------------------------------------------------------------------------------------------------------------------------------------------------------------------------------------------------------------------------------------------------------------------------------------------------------------------------------------------------------------------------------------------------------------------------------------------------------------------------------------------------------------------------------------------------------------------------------------------------------------------------------------------------------------------------------------------------------------------------------------------------------------------------------------------------------------------------------------------------------------------------------------------------------------------------------------------------------------------------------------------------------------------------------------------------------------------------------------------------------------------------------------------------------------------------------------------------------------------------------------------------------------------------------------------------------------------------------------------------------------------------------------------------------------------------------------------------------------------------------------------------------------------------------------------------------------------------------------------------------|
| <p>Metric/method of measurement: Atrial fibrillation burden (time with atrial fibrillation) as measured by continuous monitoring with insertable cardiac monitor and calculated as the cumulative duration of all atrial fibrillation episodes lasting <math>\geq 30</math>sec divided by total duration of monitoring and reported as percentages.<br/>Timepoint: Measured during the first 4 weeks (week 1-4) of the 16-week intervention period</p> <p>Outcome Name: Atrial fibrillation burden<br/>Metric/method of measurement: Atrial fibrillation burden (time with atrial fibrillation) as measured by continuous monitoring with insertable cardiac monitor and calculated as the cumulative duration of all atrial fibrillation episodes lasting <math>\geq 30</math>sec divided by total duration of monitoring and reported as percentages.<br/>Timepoint: Measured during week 5-8 of the 16-week intervention period</p> <p>Outcome Name: Atrial fibrillation burden<br/>Metric/method of measurement: Atrial fibrillation burden (time with atrial fibrillation) as measured by continuous monitoring with insertable cardiac monitor and calculated as the cumulative duration of all atrial fibrillation episodes lasting <math>\geq 30</math>sec divided by total duration of monitoring and reported as percentages.<br/>Timepoint: Measured during week 9-12 of the 16-week intervention period</p> <p>Outcome Name: Atrial fibrillation burden<br/>Metric/method of measurement: Atrial fibrillation burden (time with atrial fibrillation) as measured by continuous monitoring with insertable cardiac monitor and calculated as the cumulative duration of all atrial fibrillation episodes lasting <math>\geq 30</math>sec divided by total duration of monitoring and reported as percentages.<br/>Timepoint: Measured during week 13-16 of the 16-week intervention period</p> <p>Outcome Name: Cumulative atrial fibrillation burden<br/>Metric/method of measurement: Atrial fibrillation burden (time with atrial fibrillation) as measured by continuous monitoring with insertable cardiac monitor and calculated as the cumulative duration of all atrial fibrillation episodes lasting <math>\geq 30</math>sec divided by total duration of monitoring and reported as percentages.<br/>Timepoint: Measured during the entire 16-week intervention period</p> <p>Outcome Name: Atrial fibrillation episode duration<br/>Metric/method of measurement: Mean duration of atrial fibrillation episodes lasting <math>\geq 30</math>sec<br/>Timepoint: Measured during the 16-week intervention period</p> <p>Outcome Name: Atrial fibrillation episodes<br/>Metric/method of measurement: Number of atrial fibrillation episodes lasting <math>\geq 30</math>sec, as measured by insertable cardiac monitor<br/>Timepoint: Measured during the first 4 weeks (week 1-4) of the 16-week intervention period</p> <p>Outcome Name: Atrial fibrillation episodes</p> |
|-------------------------------------------------------------------------------------------------------------------------------------------------------------------------------------------------------------------------------------------------------------------------------------------------------------------------------------------------------------------------------------------------------------------------------------------------------------------------------------------------------------------------------------------------------------------------------------------------------------------------------------------------------------------------------------------------------------------------------------------------------------------------------------------------------------------------------------------------------------------------------------------------------------------------------------------------------------------------------------------------------------------------------------------------------------------------------------------------------------------------------------------------------------------------------------------------------------------------------------------------------------------------------------------------------------------------------------------------------------------------------------------------------------------------------------------------------------------------------------------------------------------------------------------------------------------------------------------------------------------------------------------------------------------------------------------------------------------------------------------------------------------------------------------------------------------------------------------------------------------------------------------------------------------------------------------------------------------------------------------------------------------------------------------------------------------------------------------------------------------------------------------------------------------------------------------------------------------------------------------------------------------------------------------------------------------------------------------------------------------------------------------------------------------------------------------------------------------------------------------------------------------------------------------------------------------------------------------------------------------------------------------------------------------------------------------------------------------------------------------------------------------------------------------------------------------------------------------------------------------------------------------------------------------------------------------------------------------------------------------------|

|                                                                                                                                                                                                                                                                                                                                                                                                                                                                                                                                                                                                                                                                                                                                                                                                                                                                                                                                                                                                                                                                                                                                                                                                                                                                                                                                                                                                                                                                                                                                                                                                                                                                                                                                                                                                                                                                                                                                                                                                                                                                                                                                                                                                                                                                                                                                                                                                                                                                                                                                                                                                                                                                                                                  |
|------------------------------------------------------------------------------------------------------------------------------------------------------------------------------------------------------------------------------------------------------------------------------------------------------------------------------------------------------------------------------------------------------------------------------------------------------------------------------------------------------------------------------------------------------------------------------------------------------------------------------------------------------------------------------------------------------------------------------------------------------------------------------------------------------------------------------------------------------------------------------------------------------------------------------------------------------------------------------------------------------------------------------------------------------------------------------------------------------------------------------------------------------------------------------------------------------------------------------------------------------------------------------------------------------------------------------------------------------------------------------------------------------------------------------------------------------------------------------------------------------------------------------------------------------------------------------------------------------------------------------------------------------------------------------------------------------------------------------------------------------------------------------------------------------------------------------------------------------------------------------------------------------------------------------------------------------------------------------------------------------------------------------------------------------------------------------------------------------------------------------------------------------------------------------------------------------------------------------------------------------------------------------------------------------------------------------------------------------------------------------------------------------------------------------------------------------------------------------------------------------------------------------------------------------------------------------------------------------------------------------------------------------------------------------------------------------------------|
| <p>Metric/method of measurement: Number of atrial fibrillation episodes lasting <math>\geq 30</math>sec, as measured by insertable cardiac monitor<br/>Timepoint: Measured during week 5-8 of the 16-week intervention period</p> <p>Outcome Name: Atrial fibrillation episodes<br/>Metric/method of measurement: Number of atrial fibrillation episodes lasting <math>\geq 30</math>sec, as measured by insertable cardiac monitor<br/>Timepoint: Measured during week 9-12 of the 16-week intervention period</p> <p>Outcome Name: Atrial fibrillation episodes<br/>Metric/method of measurement: Number of atrial fibrillation episodes lasting <math>\geq 30</math>sec, as measured by insertable cardiac monitor<br/>Timepoint: Measured during week 13-16 of the 16-week intervention period</p> <p>Outcome Name: Cumulative atrial fibrillation episodes<br/>Metric/method of measurement: Number of atrial fibrillation episodes lasting <math>\geq 30</math>sec, as measured by insertable cardiac monitor<br/>Timepoint: Measured during the 16-week intervention period</p> <p>Outcome Name: Days with atrial fibrillation<br/>Metric/method of measurement: Days with at least one episode of atrial fibrillation lasting <math>\geq 30</math>sec<br/>Timepoint: Measured during the 16-week intervention period</p> <p>Outcome Name: Days without atrial fibrillation<br/>Metric/method of measurement: Days without at least one episode of atrial fibrillation lasting <math>\geq 30</math>sec<br/>Timepoint: Measured during the 16-week intervention period</p> <p>Outcome Name: Relative change in atrial fibrillation burden<br/>Metric/method of measurement: Relative change in atrial fibrillation burden as measured by continuous monitoring with insertable cardiac monitor and calculated as the cumulative duration of all atrial fibrillation episodes lasting <math>\geq 30</math>sec divided by total duration of monitoring<br/>Timepoint: Measured during the 4-week baseline period prior to randomization and during the last 4 weeks of the 16-week intervention period</p> <p>Outcome Name: Relative change in atrial fibrillation burden<br/>Metric/method of measurement: Relative change in atrial fibrillation burden as measured by continuous monitoring with insertable cardiac monitor and calculated as the cumulative duration of all atrial fibrillation episodes lasting <math>\geq 30</math>sec divided by total duration of monitoring<br/>Timepoint: Measured during the 4-week baseline period prior to randomization and during the first 4 weeks of the 16-week intervention period</p> <p>Outcome Name: Relative change in atrial fibrillation burden</p> |
|------------------------------------------------------------------------------------------------------------------------------------------------------------------------------------------------------------------------------------------------------------------------------------------------------------------------------------------------------------------------------------------------------------------------------------------------------------------------------------------------------------------------------------------------------------------------------------------------------------------------------------------------------------------------------------------------------------------------------------------------------------------------------------------------------------------------------------------------------------------------------------------------------------------------------------------------------------------------------------------------------------------------------------------------------------------------------------------------------------------------------------------------------------------------------------------------------------------------------------------------------------------------------------------------------------------------------------------------------------------------------------------------------------------------------------------------------------------------------------------------------------------------------------------------------------------------------------------------------------------------------------------------------------------------------------------------------------------------------------------------------------------------------------------------------------------------------------------------------------------------------------------------------------------------------------------------------------------------------------------------------------------------------------------------------------------------------------------------------------------------------------------------------------------------------------------------------------------------------------------------------------------------------------------------------------------------------------------------------------------------------------------------------------------------------------------------------------------------------------------------------------------------------------------------------------------------------------------------------------------------------------------------------------------------------------------------------------------|

|                                                                                                                                                                                                                                                                                                                                                                                                                                                                                                                                                                                                                                                                                                                                                                                                                                                                                                                                                                                                                                                                                                                                                                                                                                                                                                                                                                                                                                                                                                                                                                                                                                                                                                                                                                                                                                                                                                                                                                                                                                                                                                                                                                                                                                                                                                                                                                                                                                                                                                              |
|--------------------------------------------------------------------------------------------------------------------------------------------------------------------------------------------------------------------------------------------------------------------------------------------------------------------------------------------------------------------------------------------------------------------------------------------------------------------------------------------------------------------------------------------------------------------------------------------------------------------------------------------------------------------------------------------------------------------------------------------------------------------------------------------------------------------------------------------------------------------------------------------------------------------------------------------------------------------------------------------------------------------------------------------------------------------------------------------------------------------------------------------------------------------------------------------------------------------------------------------------------------------------------------------------------------------------------------------------------------------------------------------------------------------------------------------------------------------------------------------------------------------------------------------------------------------------------------------------------------------------------------------------------------------------------------------------------------------------------------------------------------------------------------------------------------------------------------------------------------------------------------------------------------------------------------------------------------------------------------------------------------------------------------------------------------------------------------------------------------------------------------------------------------------------------------------------------------------------------------------------------------------------------------------------------------------------------------------------------------------------------------------------------------------------------------------------------------------------------------------------------------|
| <p>Metric/method of measurement: Relative change in atrial fibrillation burden as measured by continuous monitoring with insertable cardiac monitor and calculated as the cumulative duration of all atrial fibrillation episodes lasting <math>\geq 30</math>sec divided by total duration of monitoring</p> <p>Timepoint: Measured during the 4-week baseline period prior to randomization and during the entire 16-week intervention period</p> <p>Outcome Name: Adherence to prescribed exercise</p> <p>Metric/method of measurement: Adherence to prescribed exercise (<math>&gt;80\%</math> of exercise with <math>\geq 85\%</math> and <math>\leq 75\%</math> of maximum heart rate, respectively) registered with sports watches</p> <p>Timepoint: 16 weeks</p> <p>Outcome Name: Exercise capacity</p> <p>Metric/method of measurement: Peak oxygen uptake (<math>VO_{2peak}</math>) measured during cardiopulmonary exercise testing</p> <p>Timepoint: Measured at the baseline study visit and at the final study visit after the 16-week intervention period</p> <p>Outcome Name: Atrial volumes</p> <p>Metric/method of measurement: Right and left atrial volumes measured with echocardiography</p> <p>Timepoint: Measured at the baseline study visit and at the final study visit after the 16-week intervention period</p> <p>Outcome Name: Ventricular volumes</p> <p>Metric/method of measurement: Right and left ventricular volumes measured with echocardiography</p> <p>Timepoint: Measured at the baseline study visit and at the final study visit after the 16-week intervention period</p> <p>Outcome Name: Atrial function</p> <p>Metric/method of measurement: Right and left atrial function measured with strain during echocardiography</p> <p>Timepoint: Measured at the baseline study visit and at the final study visit after the 16-week intervention period</p> <p>Outcome Name: Ventricular function</p> <p>Metric/method of measurement: Right and left ventricular function measured with strain during echocardiography</p> <p>Timepoint: Measured at the baseline study visit and at the final study visit after the 16-week intervention period</p> <p>Outcome Name: Ventricular systolic function</p> <p>Metric/method of measurement: Right and left ventricular ejection fraction measured with strain during echocardiography</p> <p>Timepoint: Measured at the baseline study visit and at the final study visit after the 16-week intervention period</p> |
|--------------------------------------------------------------------------------------------------------------------------------------------------------------------------------------------------------------------------------------------------------------------------------------------------------------------------------------------------------------------------------------------------------------------------------------------------------------------------------------------------------------------------------------------------------------------------------------------------------------------------------------------------------------------------------------------------------------------------------------------------------------------------------------------------------------------------------------------------------------------------------------------------------------------------------------------------------------------------------------------------------------------------------------------------------------------------------------------------------------------------------------------------------------------------------------------------------------------------------------------------------------------------------------------------------------------------------------------------------------------------------------------------------------------------------------------------------------------------------------------------------------------------------------------------------------------------------------------------------------------------------------------------------------------------------------------------------------------------------------------------------------------------------------------------------------------------------------------------------------------------------------------------------------------------------------------------------------------------------------------------------------------------------------------------------------------------------------------------------------------------------------------------------------------------------------------------------------------------------------------------------------------------------------------------------------------------------------------------------------------------------------------------------------------------------------------------------------------------------------------------------------|

|                                                                                                                                                                                                                                                                                                                                                                                                                                                                                                                                                                                                                                                                                                                                                                                                                                                                                                                                                                                                                                                                                                                                                                                                                                                                                                                                                                                                                                                                                                                                                                                                                                                                                                                                                                                                                                                                                                                                                                                                                                                                                                                                                                                                                                                                                                                                                                                                                                                                                                                                                                                             |
|---------------------------------------------------------------------------------------------------------------------------------------------------------------------------------------------------------------------------------------------------------------------------------------------------------------------------------------------------------------------------------------------------------------------------------------------------------------------------------------------------------------------------------------------------------------------------------------------------------------------------------------------------------------------------------------------------------------------------------------------------------------------------------------------------------------------------------------------------------------------------------------------------------------------------------------------------------------------------------------------------------------------------------------------------------------------------------------------------------------------------------------------------------------------------------------------------------------------------------------------------------------------------------------------------------------------------------------------------------------------------------------------------------------------------------------------------------------------------------------------------------------------------------------------------------------------------------------------------------------------------------------------------------------------------------------------------------------------------------------------------------------------------------------------------------------------------------------------------------------------------------------------------------------------------------------------------------------------------------------------------------------------------------------------------------------------------------------------------------------------------------------------------------------------------------------------------------------------------------------------------------------------------------------------------------------------------------------------------------------------------------------------------------------------------------------------------------------------------------------------------------------------------------------------------------------------------------------------|
| <p>Outcome Name: Atrial fibrillation symptoms<br/>Metric/method of measurement: Self-reported number of symptomatic atrial fibrillation episodes by questionnaire<br/>Timepoint: Measured at the baseline study visit and at the final study visit after the 16-week intervention period</p> <p>Outcome Name: Atrial Fibrillation Effect on Quality-of-life<br/>Metric/method of measurement: Measured with the Atrial Fibrillation Effect on Quality-of-life questionnaire (AFEQT). Minimum score 0, maximum score 100, higher values indicate better quality of life<br/>Timepoint: Measured at the baseline study visit and at the final study visit after the 16-week intervention period</p> <p>Outcome Name: Atrial fibrillation hospitalizations<br/>Metric/method of measurement: Number of unplanned hospitalizations due to atrial fibrillation cardioversion or ablation<br/>Timepoint: Throughout study completion, an average of 22 weeks</p> <p>Outcome Name: Modified European Heart Rhythm Association Symptom Scale (mEHRA) symptom classification<br/>Metric/method of measurement: Modified European Heart Rhythm Association Symptom Scale (mEHRA) questionnaire. The scale ranges from minimum 1 to maximum 4, a higher score indicates a worse symptom burden<br/>Timepoint: Measured at the baseline study visit and at the final study visit after the 16-week intervention period</p> <p>Outcome Name: Number of ventricular arrhythmias<br/>Metric/method of measurement: Ventricular arrhythmias lasting <math>\geq 12</math> ventricular complexes as measured by continuous monitoring with insertable cardiac monitor<br/>Timepoint: Throughout study completion, an average of 22 weeks</p> <p>Outcome Name: Number of adverse events<br/>Metric/method of measurement: Any unfavorable and unintended sign, symptom or illness that develops or worsens during the trial period will be reported as adverse events (AE). A serious adverse event (SAE) is defined as death, any life-threatening event or any inpatient hospitalization<br/>Timepoint: Throughout study completion, an average of 22 weeks</p> <p>Outcome Name: Cardiovascular risk factors measured by blood pressure<br/>Metric/method of measurement: Measure of blood pressure (mmHg)<br/>Timepoint: Measured at baseline and after the 16-week intervention period</p> <p>Outcome Name: Cardiovascular risk factors measured by blood lipids<br/>Metric/method of measurement: Blood lipids (mmol/L)<br/>Timepoint: Measured at baseline and after the 16-week intervention period</p> |
|---------------------------------------------------------------------------------------------------------------------------------------------------------------------------------------------------------------------------------------------------------------------------------------------------------------------------------------------------------------------------------------------------------------------------------------------------------------------------------------------------------------------------------------------------------------------------------------------------------------------------------------------------------------------------------------------------------------------------------------------------------------------------------------------------------------------------------------------------------------------------------------------------------------------------------------------------------------------------------------------------------------------------------------------------------------------------------------------------------------------------------------------------------------------------------------------------------------------------------------------------------------------------------------------------------------------------------------------------------------------------------------------------------------------------------------------------------------------------------------------------------------------------------------------------------------------------------------------------------------------------------------------------------------------------------------------------------------------------------------------------------------------------------------------------------------------------------------------------------------------------------------------------------------------------------------------------------------------------------------------------------------------------------------------------------------------------------------------------------------------------------------------------------------------------------------------------------------------------------------------------------------------------------------------------------------------------------------------------------------------------------------------------------------------------------------------------------------------------------------------------------------------------------------------------------------------------------------------|

|            |                                                                                                                                                                                                                                                                                                                                                                                                                                                                                                                                                                                                                                                                                                                                                                                                                                                                                                                                                                                                                                                                                                                                                                                                                                                                                                                                                                                                                                                                                                                                                                                                                                                                                                                                                                                                                                                                                                                                                                                                                                                             |
|------------|-------------------------------------------------------------------------------------------------------------------------------------------------------------------------------------------------------------------------------------------------------------------------------------------------------------------------------------------------------------------------------------------------------------------------------------------------------------------------------------------------------------------------------------------------------------------------------------------------------------------------------------------------------------------------------------------------------------------------------------------------------------------------------------------------------------------------------------------------------------------------------------------------------------------------------------------------------------------------------------------------------------------------------------------------------------------------------------------------------------------------------------------------------------------------------------------------------------------------------------------------------------------------------------------------------------------------------------------------------------------------------------------------------------------------------------------------------------------------------------------------------------------------------------------------------------------------------------------------------------------------------------------------------------------------------------------------------------------------------------------------------------------------------------------------------------------------------------------------------------------------------------------------------------------------------------------------------------------------------------------------------------------------------------------------------------|
|            | <p>Outcome Name: Cardiovascular risk factors measured by body weight<br/>Metric/method of measurement: Weight (kg)<br/>Timepoint: Measured at baseline and after the 16-week intervention period</p> <p>Outcome Name: Cardiovascular risk factors measured by body mass index (BMI)<br/>Metric/method of measurement: BMI (weight and height will be combined to report BMI in kg/m<sup>2</sup>)<br/>Timepoint: Measured at baseline and after the 16-week intervention period</p> <p>Outcome Name: Cardiovascular risk factors measured by smoking<br/>Metric/method of measurement: Self-reported smoking (pack years)<br/>Timepoint: Measured at baseline and after the 16-week intervention period</p> <p>Outcome Name: Cardiovascular risk factors measured by alcohol use<br/>Metric/method of measurement: Self-reported alcohol use (units)<br/>Timepoint: Measured at baseline and after the 16-week intervention period</p> <p>Outcome Name: Cardiovascular biomarkers - inflammation markers<br/>Metric/method of measurement: Markers for inflammation markers; interleukines and hrCRP (mg/L)<br/>Timepoint: Measured at baseline and after the 16-week intervention period</p> <p>Outcome Name: Cardiovascular biomarkers - markers for myocardial damage<br/>Metric/method of measurement: Markers for myocardial damage, measured by troponin T (ng/L) and NT-ProBNP (ng/L)<br/>Timepoint: Measured at baseline and after the 16-week intervention period</p> <p>Outcome Name: Immediate effects on arrhythmia burden of high-intensity exercise<br/>Metric/method of measurement: Arrhythmias measured with 24-hour electrocardiogram after peak cardiopulmonary exercise testing<br/>Timepoint: 24 hours after after peak exercise testing</p> <p>Outcome Name: Immediate effects on biomarkers of exercise<br/>Metric/method of measurement: Blood sampling at peak exercise for analyses of cardiac Troponins, NT-pro-BNP, interleukins, C-reactive protein<br/>Timepoint: At peak exercise during cardiopulmonary exercise testing</p> |
| <b>21.</b> | <p><b>Ethics Review</b></p> <p>Approved 29 April 2021 by The Regional Committee for Health Research Ethics, Oslo, Norway (REK sør-øst A/212748)</p> <p>Approved 1 September 2020 by The Alfred Hospital Ethics Committee, Melbourne, Australia (HREC/76210/Alfred-2021)</p> <p>Approved 13 October 2022 by The Ethics Committee Research KU/UZ Leuven, Leuven, Belgium (S65930)</p>                                                                                                                                                                                                                                                                                                                                                                                                                                                                                                                                                                                                                                                                                                                                                                                                                                                                                                                                                                                                                                                                                                                                                                                                                                                                                                                                                                                                                                                                                                                                                                                                                                                                         |



|            |                                                                                                                                                                             |
|------------|-----------------------------------------------------------------------------------------------------------------------------------------------------------------------------|
| <b>22.</b> | <b>Completion date</b><br><br>N/A                                                                                                                                           |
| <b>23.</b> | <b>Summary Results</b><br><br>N/A                                                                                                                                           |
| <b>24.</b> | <b>IPD sharing statement</b><br><br>Data sharing between the participating institutions is regulated by Study agreements between The Sponsor and each participating center. |
