# Supplementary material for: Effects of training adaption in endurance athletes with atrial fibrillation: protocol for a multicentre randomised controlled trial
Source: HighWire-hosted journal article supplement (doi:10.1136/bmjsem-2023-001541), 2023-04-01
Supplement: bmjsem-2023-001541supp003_data_supplement.pdf [file bmjsem-2023-001541supp003_data_supplement.pdf]

### **The Norwegian Exercise and Atrial Fibrillation Initiative**

This work was executed within the framework of the research consortium the Norwegian Exercise and Atrial Fibrillation Initiative (NEXAF), which is a national research initiative aiming to increase knowledge about exercise in individuals with atrial fibrillation. NEXAF consists of several studies that will examine the impact of exercise on various endpoints for different groups of atrial fibrillation patients.

### **The NEXAF consortium**

Bente Morseth<sup>1,2</sup>, Marius Myrstad<sup>3,4</sup>, Bjarne Martens Nes<sup>5</sup>, Jan Pål Loennechen<sup>5,6</sup>, Maja-Lisa Løchen<sup>7</sup>, Arnljot Tveit<sup>4,8</sup>, Turid Apelland<sup>4</sup>, Kristine Folkenborg<sup>4</sup>, Kristoffer Robin Johansen<sup>1,2</sup>, Kristin Espolin Johnson<sup>5</sup>, Jon Magne Letnes<sup>5,6</sup>, Vegard Malmo<sup>5,6</sup>, Andreas Berg Sellevold<sup>5,6</sup>, Eivind Sørensen<sup>3,4</sup>, Rune Byrkjeland<sup>3,4</sup>, Steve Enger<sup>4</sup>, Hilde Larhammer<sup>3,4</sup>, Sophia Onarheim<sup>4</sup>, Vigdis Bache-Semb<sup>4</sup>.

### *Affiliations*

<sup>1</sup> School of Sport Sciences, Faculty of Health Sciences, UiT The Arctic University of Norway, Tromsø, Norway

<sup>2</sup> Centre for Research and Education, University Hospital of North Norway, Tromsø, Norway

<sup>3</sup> Department of Internal Medicine, Bærum Hospital, Vestre Viken Hospital Trust, N-1346 Gjøttum, Norway

<sup>4</sup> Department of Medical Research, Bærum Hospital, Vestre Viken Hospital Trust, N-1346 Gjøttum, Norway

<sup>5</sup> Department of Circulation and Medical Imaging, Norwegian University of Science and Technology, NTNU, Trondheim, Norway

<sup>6</sup> Department of Cardiology, St.Olavs Hospital, Trondheim, Norway

<sup>7</sup> Department of Community Medicine, Faculty of Health Sciences, UiT The Arctic University of Norway, Tromsø, Norway

<sup>8</sup> Faculty of Medicine, Institute for Clinical Medicine, University of Oslo, Oslo, Norway
