# Supplementary figures and images for: Effects of training adaption in endurance athletes with atrial fibrillation: protocol for a multicentre randomised controlled trial
Source: HighWire-hosted journal article supplement (doi:10.1136/bmjsem-2023-001541), 2023-04-01

## Effects of Training Adaption in Endurance Athletes with Atrial Fibrillation

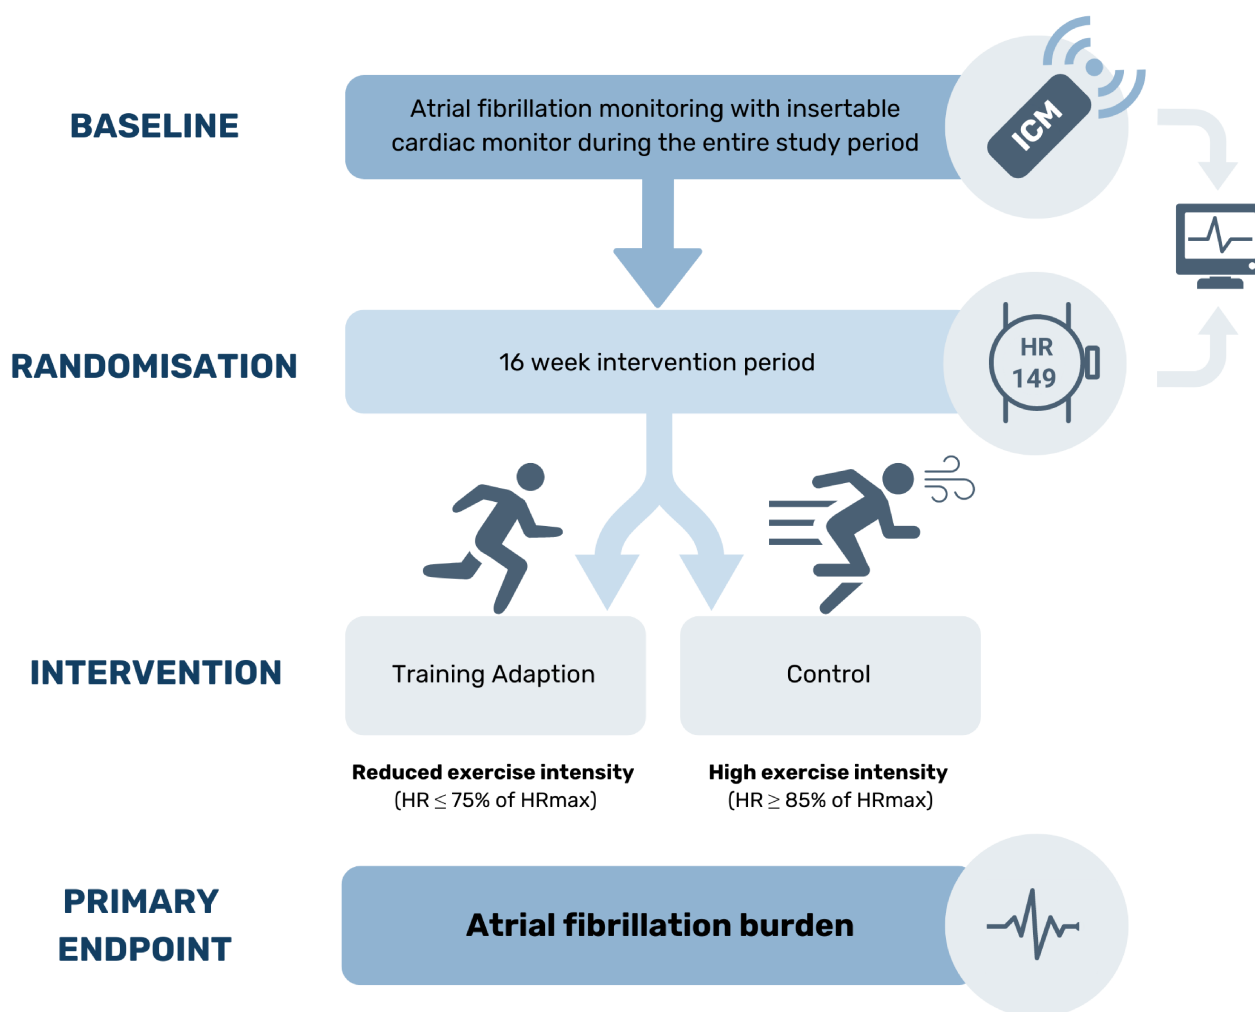

Supplement: bmjsem-2023-001541supp004_data_supplement.pdf [file bmjsem-2023-001541supp004_data_supplement.pdf]
